# Supplementary material for: Color and cellular selectivity of retinal ganglion cell subtypes through frequency modulation of electrical stimulation
Source: PubMed Central journal article supplement (PMC7933163; doi:10.1038/s41598-021-84437-w), 2021-03-04
Supplement: 41598_2021_84437_MOESM1_ESM.pdf [file 41598_2021_84437_MOESM1_ESM.pdf]

## **Supplementary Information**

# **Color and Cellular Selectivity of Retinal Ganglion Cell Subtypes Through Frequency Modulation of Electrical Stimulation**

Javad Paknahad, Kyle Loizos, Lan Yue, Mark Humayun, and Gianluca Lazzi

**SUPPLEMENTARY TABLE S1**  
RATE CONSTANTS OF IONIC CURRENTS

|            |                                                                                                                                                                                                             |                                                                                                                                                                                                                                   |
|------------|-------------------------------------------------------------------------------------------------------------------------------------------------------------------------------------------------------------|-----------------------------------------------------------------------------------------------------------------------------------------------------------------------------------------------------------------------------------|
| Na Channel | $\alpha_m = \frac{-0.6(E+30)}{e^{-0.1(E+30)} - 1}$ $\alpha_h = 0.4 e^{-(E+50)/20}$                                                                                                                          | $\beta_m = 20 e^{-(E+55)/18}$ $\beta_h = \frac{6}{e^{-0.1(E+20)} + 1}$                                                                                                                                                            |
| Ca Channel | $\alpha_c = \frac{-0.3(E+13)}{e^{-0.1(E+13)} - 1}$                                                                                                                                                          | $\beta_c = 10 e^{-(E+38)/18}$                                                                                                                                                                                                     |
| K Channel  | $\alpha_n = \frac{-0.02(E+40)}{e^{-0.1(E+40)} - 1}$                                                                                                                                                         | $\beta_n = 0.4 e^{-(E+50)/80}$                                                                                                                                                                                                    |
| A Channel  | $\alpha_A = \frac{-0.006(E+90)}{e^{-0.1(E+90)} - 1}$ $\alpha_{h_A} = 0.04 e^{-(E+70)/20}$                                                                                                                   | $\beta_A = 0.1 e^{-(E+30)/10}$ $\beta_{h_A} = \frac{0.6}{e^{-0.1(E+40)} + 1}$                                                                                                                                                     |
| h Channel  | $\alpha_l = e^{0.08316(E+75)}$                                                                                                                                                                              | $\beta_l = e^{0.033264(E+75)}$                                                                                                                                                                                                    |
| T Channel  | $\alpha_{m_T} = \left(1.7 + e^{-(E+28.8)/13.5}\right)^{-1}$ $\alpha_{h_T} = e^{-(E+160.3)/17.8}$ $\alpha_d = \frac{1 + e^{(E+37.4)/30}}{240 \left(0.5 + \left(0.25 + e^{(E+83.5)/6.3}\right)^{0.5}\right)}$ | $\beta_{m_T} = \frac{e^{-(E+63)/7.8}}{1.7 + e^{-(E+28.8)/13.5}}$ $\beta_{h_T} = \alpha_{h_T} \left( (0.25 + e^{(E+83.5)/6.3})^{0.5} - 0.5 \alpha_{h_T} \right)$ $\beta_d = \alpha_d \left( 0.25 + e^{(E+83.5)/6.3} \right)^{0.5}$ |

**SUPPLEMENTARY TABLE S2**MAXIMUM IONIC CONDUCTANCE VALUES FOR A2 AND D1 CELLS [S/CM<sup>2</sup>].

|            | RGC types    |              |              |              |
|------------|--------------|--------------|--------------|--------------|
|            | A2           |              | D1           |              |
|            | Soma         | Dendrite     | Soma         | Dendrite     |
| $g_{Na}$   | 0.3          | 0.1          | 0.2          | 0.08         |
| $g_K$      | 0.12         | 0.05         | 0.211        | 0.08         |
| $g_{K,A}$  | 3* $g_K$     | 3* $g_K$     | 3* $g_K$     | 3* $g_K$     |
| $g_{K,Ca}$ | 0.004* $g_K$ | 0.004* $g_K$ | 0.004* $g_K$ | 0.004* $g_K$ |
| $g_{Ca}$   | 0.137        | 0.05         | 0.013        | 0.01         |
| $g_h$      | 0            | 0            | 0.0001       | 3e-5         |
| $g_T$      | 0.004        | 0            | 0.002        | 0.001        |

**SUPPLEMENTARY TABLE S3**MAXIMUM IONIC CONDUCTANCE VALUES OF THE AXON FOR A2 AND D1 CELLS [S/CM<sup>2</sup>].

|           | AH       | SOCB     | NS       | DA       |
|-----------|----------|----------|----------|----------|
| $g_{Na}$  | 0.8      | 2.4      | 0.9      | 0.8      |
| $g_K$     | 0.6      | 0.8      | 0.6      | 0.6      |
| $g_{K,A}$ | 3* $g_K$ | 3* $g_K$ | 3* $g_K$ | 3* $g_K$ |

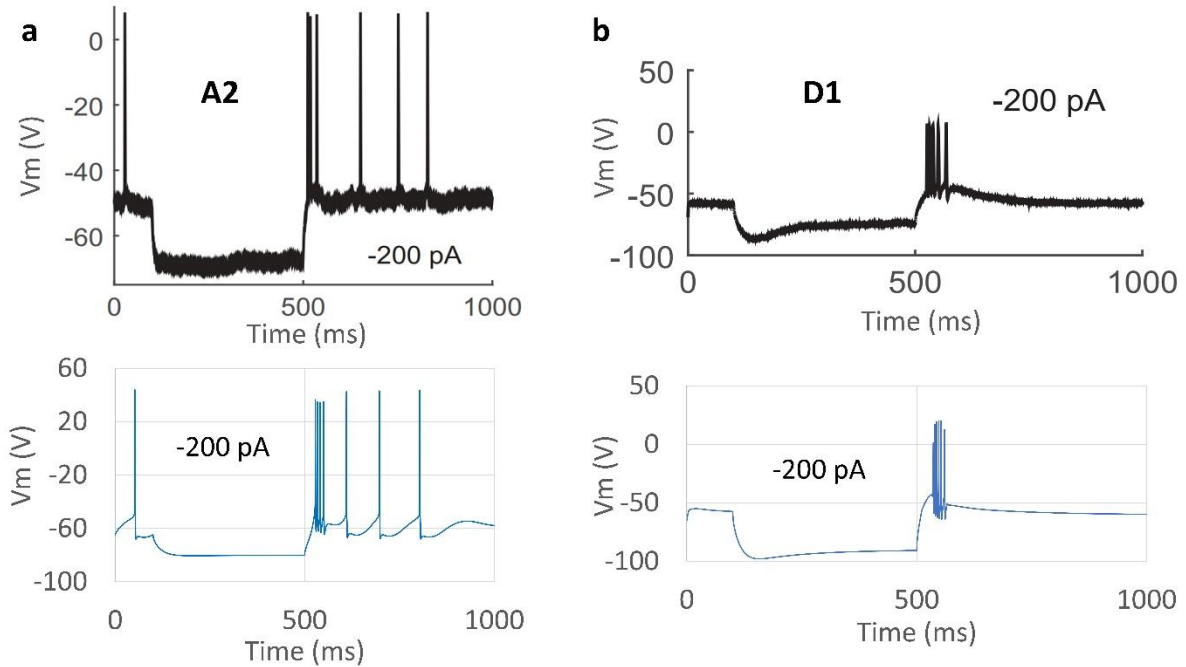

**Supplementary Fig. S1.** Comparison between experimental (top) and computational (bottom) membrane voltages in the cell body (soma) in response to intracellular stimulation. The hyperpolarizing step current stimulation was applied between 100 ms and 500 ms. **(a)**: A2 cell; **(b)**: D1 cell. Experimental data obtained from [37].
